# Supplementary material for: Scarless Total Breast Reconstruction with a Fat-augmented Latissimus Dorsi Flap
Source: PubMed Central journal article supplement — Plast Reconstr Surg Glob Open. 2021 Oct 22;9(10):e3887. doi: 10.1097/GOX.0000000000003887 (PMC8542163; doi:10.1097/gox.0000000000003887), 2021-10-22
Supplement: gox-9-e3887-s003.pdf [file gox-9-e3887-s003.pdf]

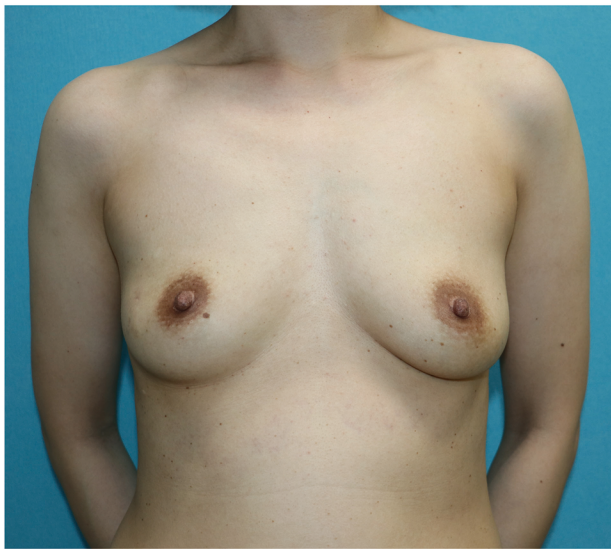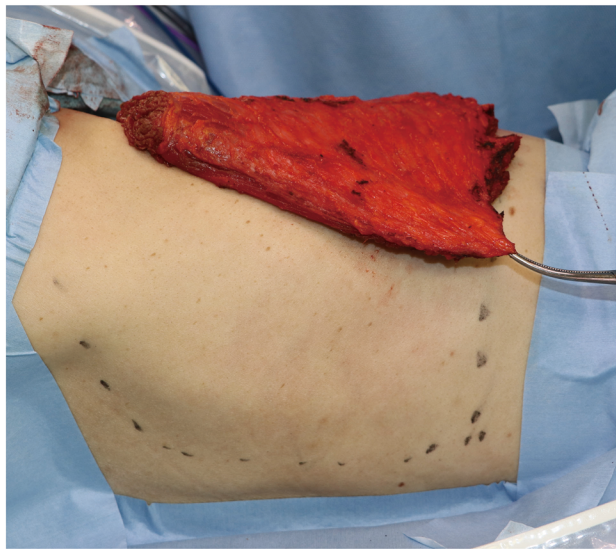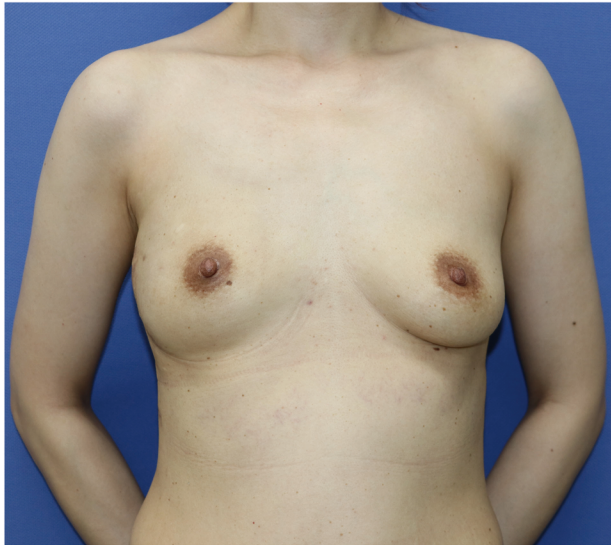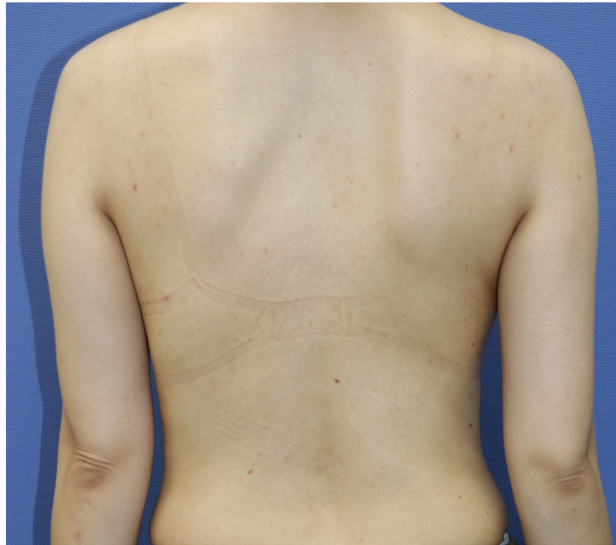

Patient 2 Right breast mastectomy and immediate reconstruction

(Upper left) preoperative image

(Upper right) intraoperative image

(Lower panels) postoperative images at six months
